# Supplementary material for: Phytoremediation of Potentially Toxic Elements from Contaminated Saline Soils Using Salvadora persica L.: Seasonal Evaluation
Source: MDPI journal article supplement (doi:10.3390/plants12030598), 2023-01-29

Supplementary Figure S1: Translocation factor (TF) and Bioconcentration factor (BCF) of *Salvadora persica* at the study sites Sandspit (Site I), Clifton (Site II) and Korangi (Site III).

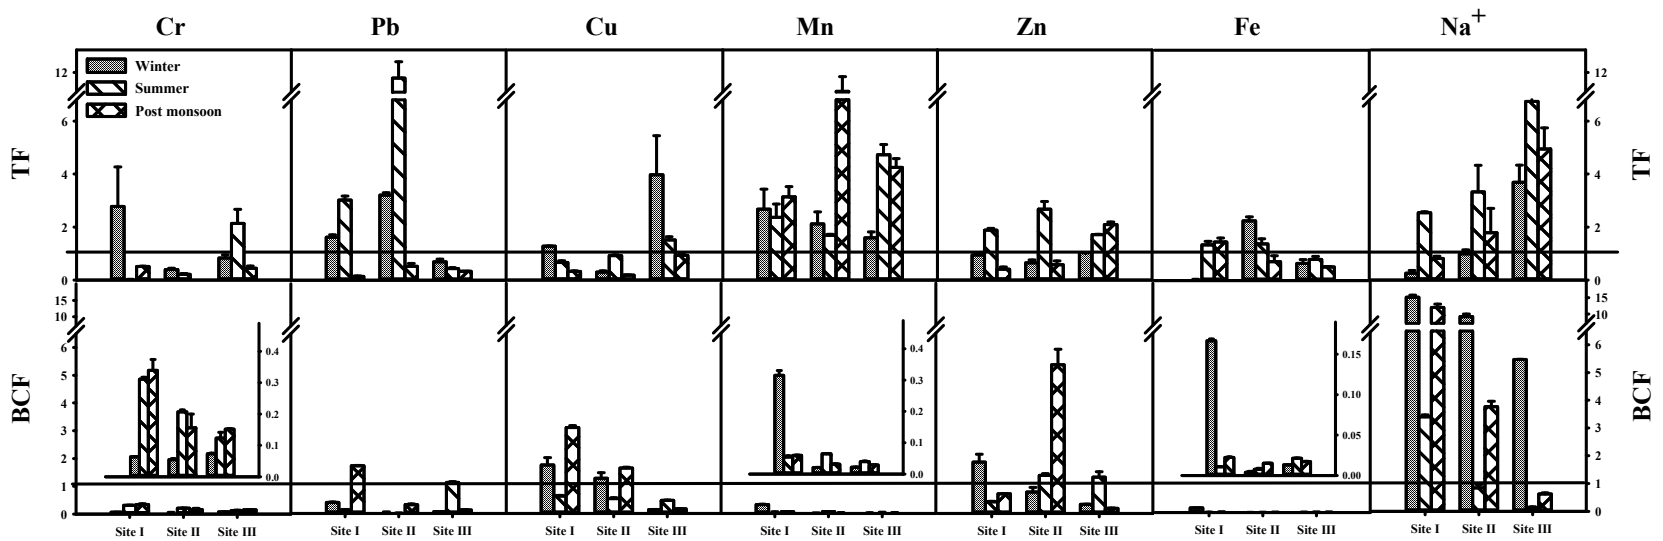

Supplement: s1 [file s1]
